# Supplementary material for: Multispecies Adulteration Detection of Camellia Oil by Chemical Markers
Source: MDPI journal article supplement (doi:10.3390/molecules23020241), 2018-01-25
Supplement: s1 [file s1]

## Supplementary Materials

Table S1. Summarized contents of target markers in four kinds of edible oils.

Table S2. Detailed results for the determination of target markers in four kinds of edible oils.

Table S3. Concentration of the target markers after adulteration.

**Table S1.** Contents of target markers in four kinds of edible oils

| Sample                   | Daidzin ng/g             |                 |       | Genistein ng/g |       |        | Genistin ng/g |      |        | Daidzein ng/g |       |        | trans-Resveratrol ng/g |      |       | Sinapic acid ng/g |         |         |
|--------------------------|--------------------------|-----------------|-------|----------------|-------|--------|---------------|------|--------|---------------|-------|--------|------------------------|------|-------|-------------------|---------|---------|
|                          | Mean                     | Min             | Max   | Mean           | Min   | Max    | Mean          | Min  | Max    | Mean          | Min   | Max    | Mean                   | Min  | Max   | Mean              | Min     | Max     |
| Camellia oil<br>(n = 12) | 0.06 ± 0.00 <sup>a</sup> | ND <sup>b</sup> | 0.46  |                | ND    |        |               | ND   |        |               | ND    |        |                        | ND   |       |                   | ND      |         |
| Peanut oil<br>(n = 7)    |                          | ND              |       |                | ND    |        |               | ND   |        |               | ND    |        | 31.76 ± 30.56          | 7.06 | 87.49 |                   | ND      |         |
| Soybean oil<br>(n = 10)  | 5.89 ± 5.74              | 1.09            | 19.85 | 137.0 ± 143.0  | 13.81 | 467.29 | 347.3 ± 239.9 | 6.15 | 643.25 | 154.4 ± 140.4 | 16.92 | 492.29 |                        | ND   |       | 3.31 ± 5.95       | 0.45    | 20.10   |
| Rapeseed oil<br>(n = 9)  |                          | ND              |       |                | ND    |        |               | ND   |        |               | ND    |        |                        | ND   |       | 2088.3 ± 1038.3   | 1383.87 | 4782.28 |

<sup>a</sup> Average value ± Standard Deviation; <sup>b</sup> ND, below the limit of detection (LOD).

**Table S2.** Detailed results for the determination of target markers in four kinds of edible oils.

| Sample ng/g     | Daidzin | Sinapic acid | Genistin | trans-Resveratrol | Daidzein | Genistein |
|-----------------|---------|--------------|----------|-------------------|----------|-----------|
| Camellia oil 1  | ND      | ND           | ND       | ND                | ND       | ND        |
| Camellia oil 2  | 0.46    | ND           | ND       | ND                | ND       | ND        |
| Camellia oil 3  | ND      | ND           | ND       | ND                | ND       | ND        |
| Camellia oil 4  | ND      | ND           | ND       | ND                | ND       | ND        |
| Camellia oil 5  | ND      | ND           | ND       | ND                | ND       | ND        |
| Camellia oil 6  | ND      | ND           | ND       | ND                | ND       | ND        |
| Camellia oil 7  | ND      | ND           | ND       | ND                | ND       | ND        |
| Camellia oil 8  | ND      | ND           | ND       | ND                | ND       | ND        |
| Camellia oil 9  | 0.1     | ND           | ND       | ND                | ND       | ND        |
| Camellia oil 10 | ND      | ND           | ND       | ND                | ND       | ND        |
| Camellia oil 11 | ND      | ND           | ND       | ND                | ND       | ND        |
| Camellia oil 12 | ND      | ND           | ND       | ND                | ND       | ND        |
| Peanut oil 1    | ND      | ND           | ND       | 21.21             | ND       | ND        |
| Peanut oil 2    | ND      | ND           | ND       | 87.49             | ND       | ND        |
| Peanut oil 3    | ND      | ND           | ND       | 15.35             | ND       | ND        |
| Peanut oil 4    | ND      | ND           | ND       | 18.31             | ND       | ND        |
| Peanut oil 5    | ND      | ND           | ND       | 7.06              | ND       | ND        |
| Peanut oil 6    | ND      | ND           | ND       | 11.15             | ND       | ND        |
| Peanut oil 7    | ND      | ND           | ND       | 61.76             | ND       | ND        |
| Rapeseed oil1   | ND      | 1528.26      | ND       | ND                | ND       | ND        |
| Rapeseed oil2   | ND      | 4782.28      | ND       | ND                | ND       | ND        |
| Rapeseed oil3   | ND      | 1383.87      | ND       | ND                | ND       | ND        |
| Rapeseed oil4   | ND      | 1586.55      | ND       | ND                | ND       | ND        |
| Rapeseed oil5   | ND      | 1716.62      | ND       | ND                | ND       | ND        |
| Rapeseed oil6   | ND      | 1920.35      | ND       | ND                | ND       | ND        |
| Rapeseed oil7   | ND      | 2063.55      | ND       | ND                | ND       | ND        |
| Rapeseed oil8   | ND      | 1716.52      | ND       | ND                | ND       | ND        |
| Rapeseed oil9   | ND      | 2097.09      | ND       | ND                | ND       | ND        |
| Soybean oil1    | 2.58    | 20.10        | 6.15     | ND                | 124.85   | 467.29    |
| Soybean oil2    | 19.85   | 0.55         | 643.25   | ND                | 16.92    | 13.81     |
| Soybean oil3    | 1.09    | 0.48         | 160.01   | ND                | 115.55   | 112.08    |
| Soybean oil4    | 2.04    | 2.41         | 159.34   | ND                | 44.15    | 27.40     |
| Soybean oil5    | 9.43    | 1.61         | 824.62   | ND                | 492.29   | 292.56    |
| Soybean oil6    | 2.19    | 2.66         | 310.59   | ND                | 258.66   | 181.66    |
| Soybean oil7    | 9.71    | 1.88         | 328.49   | ND                | 204.36   | 84.65     |
| Soybean oil8    | 4.31    | 0.45         | 251.90   | ND                | 159.23   | 99.18     |
| Soybean oil9    | 4.60    | 1.58         | 409.18   | ND                | 66.82    | 54.13     |
| Soybean oil10   | 3.14    | 1.33         | 379.61   | ND                | 61.59    | 37.51     |

**Table S3.** Concentration of the target markers after adulteration

| Authentic oils  | Compounds                | Concentration of the target markers after adulteration |                                            |                                            |                                          |                                          |                                             |                                               |
|-----------------|--------------------------|--------------------------------------------------------|--------------------------------------------|--------------------------------------------|------------------------------------------|------------------------------------------|---------------------------------------------|-----------------------------------------------|
|                 |                          | adulterated<br>with 10%<br>PO <sup>a</sup>             | adulterated<br>with 10%<br>SO <sup>b</sup> | adulterated<br>with 10%<br>RO <sup>c</sup> | adulterated<br>with 10% PO<br>and 10% SO | adulterated<br>with 10% PO<br>and 10% RO | adulterated<br>with 10%<br>SO and 10%<br>RO | adulterated with<br>10%SO,10% RO<br>and 10%PO |
| camellia oil 3  | Daidzin (ng/g)           | ND                                                     | 4.90 ± 0.19                                | ND                                         | 10.88 ± 0.00                             | ND                                       | 6.52 ± 0.05                                 | 11.10 ± 0.60                                  |
|                 | Sinapic acid (ng/g)      | ND                                                     | 22.32 ± 0.12                               | 239.46 ± 4.21                              | 24.49 ± 0.56                             | 250.74 ± 2.49                            | 274.90 ± 6.96                               | 252.35 ± 9.13                                 |
|                 | Genistin (ng/g)          | ND                                                     | 17.47 ± 0.19                               | ND                                         | 33.25 ± 0.91                             | ND                                       | 19.66 ± 1.28                                | 31.71 ± 0.72                                  |
|                 | trans-Resveratrol (ng/g) | 1.12 ± 0.52                                            | ND                                         | ND                                         | 2.05 ± 0.70                              | 2.33 ± 0.12                              | ND                                          | 2.81 ± 0.14                                   |
|                 | Daidzein (ng/g)          | ND                                                     | 8.18 ± 1.42                                | ND                                         | 9.70 ± 1.02                              | ND                                       | 13.13 ± 0.70                                | 12.50 ± 0.74                                  |
|                 | Genistein (ng/g)         | ND                                                     | 64.34 ± 0.90                               | ND                                         | 61.93 ± 4.13                             | ND                                       | 75.78 ± 2.53                                | 76.98 ± 0.74                                  |
| camellia oil 11 | Daidzin (ng/g)           | ND                                                     | 7.20 ± 0.21                                | ND                                         | 6.45 ± 0.42                              | ND                                       | 6.05 ± 0.40                                 | 7.94 ± 0.36                                   |
|                 | Sinapic acid (ng/g)      | ND                                                     | 28.10 ± 1.86                               | 221.83 ± 3.13                              | 26.39 ± 2.42                             | 243.50 ± 5.12                            | 254.85 ± 0.41                               | 246.58 ± 0.35                                 |
|                 | Genistin (ng/g)          | ND                                                     | 22.05 ± 0.57                               | ND                                         | 20.55 ± 0.58                             | ND                                       | 17.00 ± 0.77                                | 22.94 ± 0.70                                  |
|                 | trans-Resveratrol (ng/g) | 0.76 ± 0.64                                            | ND                                         | ND                                         | 1.48 ± 0.29                              | 3.08 ± 0.86                              | ND                                          | 1.67 ± 0.73                                   |
|                 | Daidzein (ng/g)          | ND                                                     | 10.62 ± 0.65                               | ND                                         | 10.27 ± 0.32                             | ND                                       | 11.83 ± 1.04                                | 12.07 ± 0.58                                  |
|                 | Genistein (ng/g)         | ND                                                     | 70.21 ± 0.85                               | ND                                         | 67.26 ± 3.54                             | ND                                       | 71.25 ± 4.86                                | 73.91 ± 2.54                                  |
| camellia oil 12 | Daidzin (ng/g)           | ND                                                     | 2.9 ± 0.12                                 | ND                                         | 4.05 ± 0.29                              | ND                                       | 4.3 ± 0.08                                  | 4.76 ± 0.14                                   |
|                 | Sinapic acid (ng/g)      | ND                                                     | 30.56 ± 1.66                               | 229.92 ± 5.64                              | 35.95 ± 2.49                             | 241.62 ± 0.72                            | 256.53 ±<br>12.05                           | 253.51 ± 1.94                                 |
|                 | Genistin (ng/g)          | ND                                                     | 8.29 ± 0.72                                | ND                                         | 13.12 ± 0.43                             | ND                                       | 13.49 ± 0.92                                | 14.61 ± 0.16                                  |
|                 | trans-Resveratrol (ng/g) | 0.71 ± 0.65                                            | ND                                         | ND                                         | 3.08 ± 1.36                              | 2.11 ± 0.18                              | ND                                          | 3.28 ± 1.12                                   |
|                 | Daidzein ( ng/g)         | ND                                                     | 9.15 ± 0.62                                | ND                                         | 11.69 ± 0.21                             | ND                                       | 10.82 ± 0.01                                | 11.61 ± 0.08                                  |
|                 | Genistein ( ng/g)        | ND                                                     | 66.68 ± 1.39                               | ND                                         | 74.99 ± 1.83                             | ND                                       | 64.12 ± 2.27                                | 69.19 ± 1.25                                  |

<sup>a</sup> PO = Peanut oil; <sup>b</sup> SO = Soybean oil; <sup>c</sup> RO = Rapeseed oil.
